# Supplementary material for: Nitrogen Release in Soils Amended with Different Organic and Inorganic Fertilizers under Contrasting Moisture Regimes: A Laboratory Incubation Study
Source: MDPI journal article supplement (doi:10.3390/agronomy11112163), 2021-10-27
Supplement: s1 [file s1]

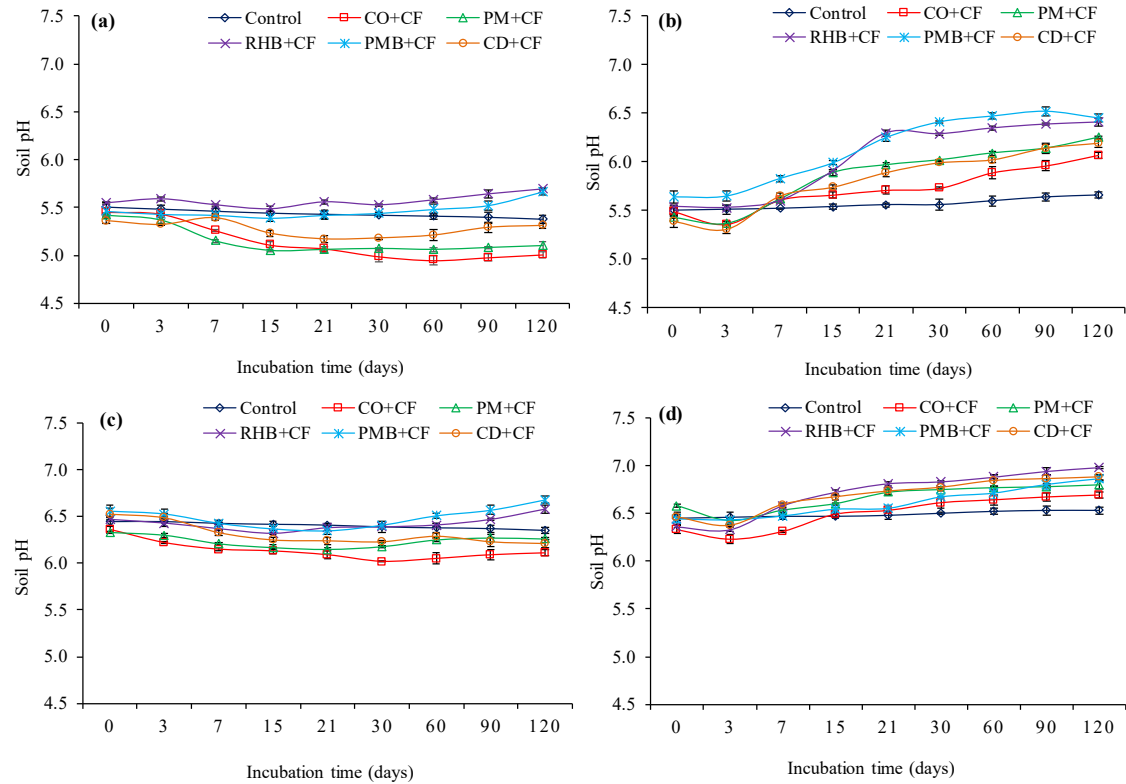

**Figure S2.** Trend of changes in soil pH in (a) acidic soil with FC; (b) acidic soil with CSW; (c) charland soil with FC; and (d) charland soil with CSW after addition of organic amendments during the 120 days of incubation period.
